# Supplementary material for: Material selection and optimization for highly stable composite bipolar plates in vanadium redox flow batteries
Source: Royal Society of Chemistry journal article supplement (doi:10.1039/c4ta03542a), 2014-01-01
Supplement: c4ta03542a1.pdf [file c4ta03542a1.pdf]

## Supplementary Information

### Material Selection and Optimization for Highly-Stable Composite Bipolar Plates in Vanadium Redox Flow Batteries

*Minjoon Park, Yang-jae Jung, Jaechan Ryu, Jaephil Cho\**

School of Energy and Chemical Engineering, Ulsan National Institute of Science and  
Technology (UNIST), Ulsan, 689-798, South Korea

**\*Corresponding author**

E-mail: [jpcho@unist.ac.kr](mailto:jpcho@unist.ac.kr)

**Table S1.** Physical properties of various conductive materials used in the composite bipolar plate fabrications.

| No. | Sample name         | Particle size              | Shape          | Source                 |
|-----|---------------------|----------------------------|----------------|------------------------|
| 1   | Natural graphite    | average < 80 $\mu\text{m}$ | Flake type     | QKG-196,GK graphite    |
| 2   | Natural graphite    | average < 20 $\mu\text{m}$ | Flake type     | Cond20, GK graphite    |
| 3   | Natural graphite    | average < 5 $\mu\text{m}$  | Flake type     | Cond5, GK graphite     |
| 4   | Artificial graphite | average < 20 $\mu\text{m}$ | Spherical type | MCMB, Oaska gas        |
| 5   | Artificial graphite | average < 20 $\mu\text{m}$ | Flake type     | AGP-3, <i>BTR</i>      |
| 6   | Exfoliated graphite | average < 3 $\mu\text{m}$  | Flake type     | ES 100, GK graphite    |
| 7   | Ketjenblack carbon  | average < 50 nm            | Spherical type | EC-600-JD, Akzo nobel  |
| 8   | Carbon fiber        | average 7-10 $\mu\text{m}$ | Fiber type     | CF-20-3, Nippon carbon |

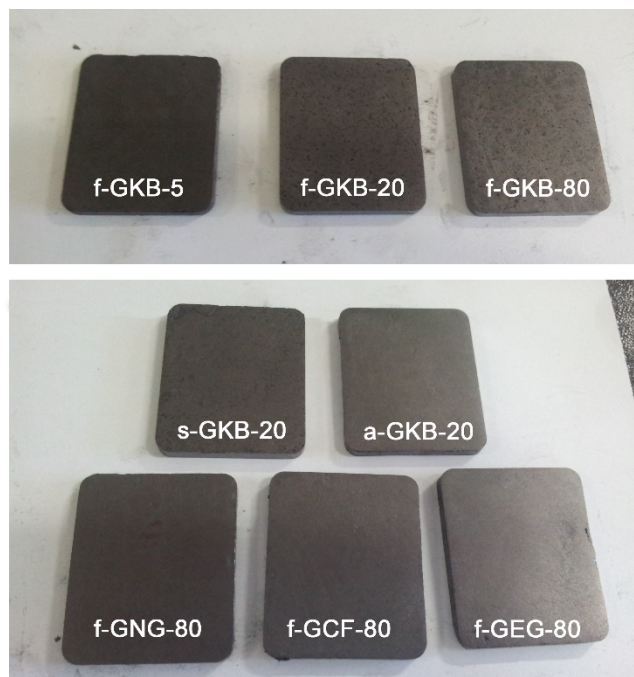

**Figure S1.** The digital photograph of the as-prepared composite bipolar plate samples ( $3 \times 4$  cm<sup>2</sup> with thickness of 0.3 cm).

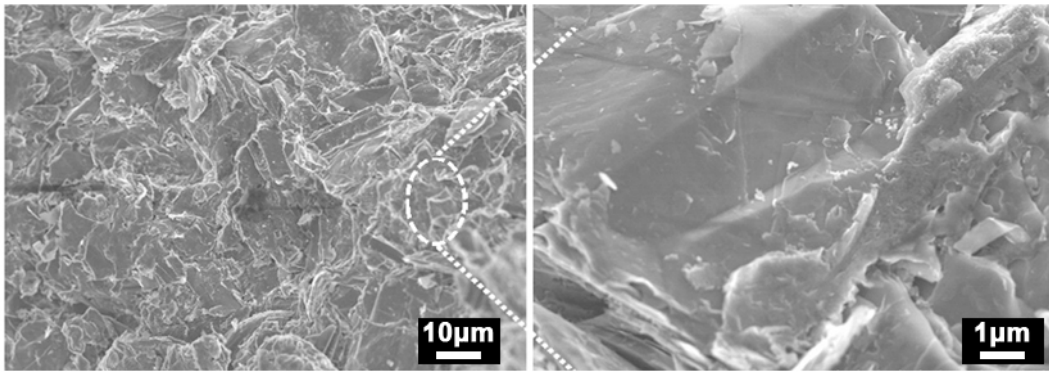

**Figure S2.** SEM image of the fractured a-GKB-20 composite bipolar plates with magnified image.

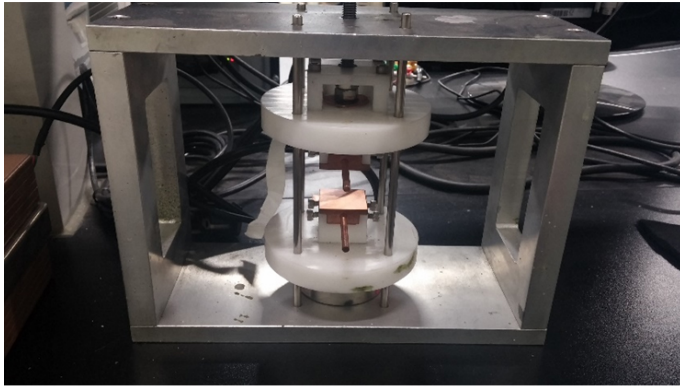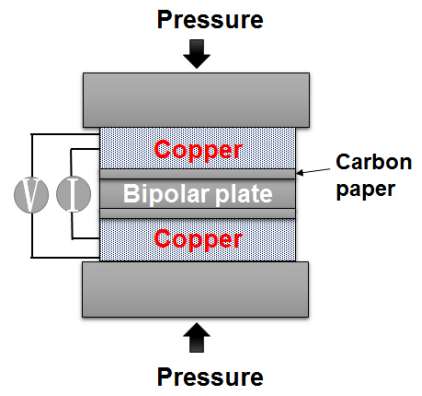

**Figure S3.** Test setup for through-plane measurement was designed in our laboratory

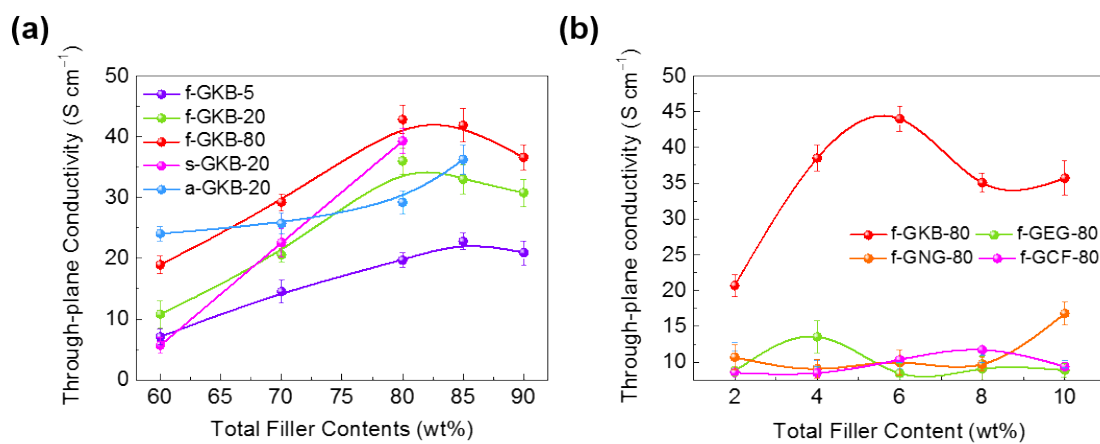

**Figure S4.** Through-conductivity of composites. Effect on (a) major filler types and (b) minor filler types versus total filler contents. Every data point is an average of five individual measurements and the error bar represents the standard deviation of the mean.

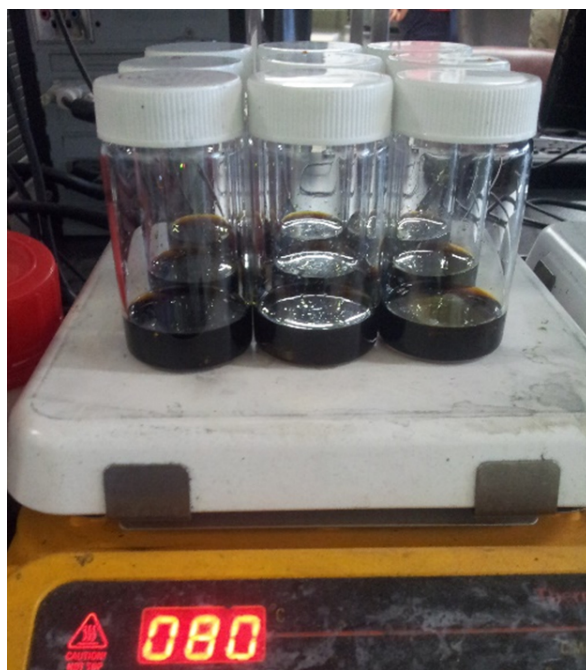

**Figure S5.** Stability test of the as-prepared bipolar plates in vanadium electrolyte solution at 80 °C for a week.
